# Supplementary material for: Effects of a natural precipitation gradient on fish and macroinvertebrate assemblages in coastal streams
Source: PeerJ. 2021 Oct 1;9:e12137. doi: 10.7717/peerj.12137 (PMC8489409; doi:10.7717/peerj.12137)
Supplement: Supplemental Information 5 — Tabs 1-3 contain source data for environmental predictors, fish communities, and invertebrate communities. Tabs 4-9 contain statistical outputs for regression and ordination models. Tab 10 contains supplemental environmental data that was collected but not used in the analyses. Tab 11 contains variable descriptions. [file peerj-09-12137-s005.xlsx]

## Sheet: S1_env
Site Name	USGS Station ID	Precipitation (cm/yr)	Flashiness	Low Flow Pulse %	Channel Shape	NH4+ (mg/L)	Conductivity ln(µS/cm)
San Fernando	8211900	67.75	0.907	20.306	15.762	0.298	6.88653
Tranquitas	8212300	67.75	0.781	24.06	17.988	0.153	9.09639
Medio	8189300	79.13	0.993	0	18.405	0.113	6.74788
Aransas	8189700	80.77	1.053	7.664	11.781	0.105	6.83465
Mission	8189500	85.36	0.58	3.357	14.701	0.17	7.16317
Perdido	8177300	92.37	1.339	0	15.152	0.075	6.60225
Garcitas	8164600	102.41	0.806	4.867	18.161	0.098	6.24949
Placedo	8164800	104.65	0.921	5.482	13.38	0.088	7.03483
Big Creek	8115000	120.31	0.961	15.631	23.15	0.118	5.39021
Bear Branch	8068390	124.19	0.777	13.146	12.011	0.133	5.4255

## Sheet: S2_fish
Site Name	STAID	A.melas	A.rostrata	H.cyanoguttatus	C.lutrensis	C.venusta	E.gracile	F.notatus	G.affinis	L.auritis	L.cyanellus	L.gulosus	L.humilis	L.macrochirus	L.marginatus	L.megalotis	P.latipinna	P.vigilax	T.maculatus
Aransas	8189700	0	0	1	27	0	0	0	0	3	0	0	0	5	0	3	0	0	0
Bear Branch	8068390	0	0	0	2	3	0	5	1	0	0	2	0	21	0	29	0	3	0
Big Creek	8115000	0	0	0	10	0	0	0	4	0	6	1	0	5	0	8	0	4	0
Garcitas	8164600	0	1	0	0	0	0	0	22	0	2	0	2	15	4	30	0	0	0
Medio	8189300	0	0	0	0	0	0	0	11	0	5	1	0	7	0	0	0	0	0
Mission	8189500	0	2	1	0	0	1	0	1	0	0	0	0	1	0	5	0	0	0
Perdido	8177300	0	0	0	0	0	0	1	1	2	2	0	0	2	0	3	0	0	0
Placedo	8164800	3	4	0	67	0	0	0	6	0	0	2	0	6	0	17	0	3	1
San Fernando	8211900	0	0	0	0	0	0	0	3	0	0	0	0	0	0	0	36	2	0
Tranquitas	8212300	0	0	0	0	0	0	0	8	0	0	0	0	0	0	0	4	0	0

## Sheet: S3_invert
Site Name	STAID	Alisotrichia	Ameletus	Ametropus	Amnicola	Amphiagrion	Ancyronyx	Argia	Baetis	Baetodes	Belastoma	Berosus	Biomphalaria	Bithynia	Brachycerus	Brechmorhoga	Caecidotea	Caenis	Calopteryx	Camelobaetidius	Campeloma	Centroptilum	Cercobrachys	Cheumatopsyche	Chromagrion	Cloeon	Corbicula	Cyphon	Dubraphia	Elodes	Erpetogomphus	Erythemis	Fallceon	Farrodes	Ferrissia	Fossaria	Gammarus	Glaenocorisa	Gyraulus	Gyretes	Hebrus	Helicina	Helisoma	Hetaerina	Heterelmis	Hyalella	Hydraena	Hydrobius	Hydropsyche
Aransas	8189700	0	3226	0	0	0	0	3226	3226	0	0	0	0	1613	0	1613	0	0	0	3226	0	0	3226	4839	0	0	1613	0	1613	0	3226	0	0	1613	1613	0	1613	0	0	0	0	1613	0	0	0	1613	0	0	1613
Bear Branch	8068390	1158	1158	0	0	0	0	0	0	1158	0	0	0	1158	0	0	0	1158	0	0	0	0	1158	2316	0	0	3474	0	0	0	0	0	1158	0	0	0	0	0	0	0	0	0	0	0	0	2316	0	0	0
Big Creek	8115000	0	0	0	0	0	0	0	0	0	325	0	0	325	325	0	0	650	0	0	0	0	0	325	0	0	0	0	0	0	0	0	325	0	0	0	0	0	0	0	0	0	0	0	0	650	0	0	0
Garcitas	8164600	0	0	0	182	0	91	0	0	0	0	0	0	0	0	0	0	0	0	0	0	0	0	91	0	0	182	91	91	91	0	0	91	0	91	0	0	0	0	0	0	0	0	0	0	182	0	0	0
Medio	8189300	0	0	0	0	867	0	867	0	0	0	0	867	867	0	0	0	867	0	0	0	867	0	0	0	0	0	0	0	0	0	867	0	0	0	0	0	0	0	0	0	0	0	0	0	867	867	867	0
Mission	8189500	0	0	0	0	0	381	381	0	0	0	0	0	0	0	0	0	381	381	0	0	0	0	0	381	0	0	381	381	0	0	0	0	381	381	381	0	0	0	381	0	0	0	0	381	381	0	0	0
Perdido	8177300	0	314	0	0	628	0	314	314	0	0	0	0	0	628	0	0	0	0	0	0	0	314	314	0	0	628	0	0	0	0	0	628	314	0	0	0	0	0	0	0	0	628	0	0	628	314	0	0
Placedo	8164800	0	0	0	392	0	0	0	0	0	0	0	0	0	0	0	0	0	0	0	392	0	0	392	0	0	0	392	392	0	0	0	0	0	0	0	0	0	0	0	0	0	392	0	0	392	0	0	0
San Fernando	8211900	0	0	0	756	0	0	1512	0	0	0	0	0	0	0	756	1512	0	0	0	0	0	0	1512	0	0	756	0	0	0	1512	0	0	0	0	0	756	0	0	0	756	0	0	0	0	756	0	0	0
Tranquitas	8212300	0	0	0	3328	0	0	0	0	0	0	0	3328	3328	0	0	0	0	0	0	3328	0	0	0	0	0	0	0	0	0	0	0	0	0	0	3328	0	0	0	0	0	0	0	0	0	0	0	0	0
[truncated: 47 more columns]

## Sheet: S4_E_lm
Univariate regressions between environmental predictors
Response	Input	Sign	Slope	R2	F-stat	df	p-value
NH4+	Canopy	+	0.643316	0.413855	5.64851	2	0.045 *
Rosgen Index	Conductivity	-	0.0742787	0.00551733	0.0443835	2	0.838
Conductivity	Flashiness	-	0.174363	0.0304024	0.250845	2	0.63
Low Flow Pulse %	Flashiness	-	0.309335	0.095688	0.846504	2	0.384
NH4	Flashiness	-	0.372768	0.138956	1.29105	2	0.289
Rosgen Index	Flashiness	+	0.00730512	5.33648e-05	0.000426942	2	0.984
Conductivity	Low Flow Pulse %	+	0.284838	0.0811326	0.706371	2	0.425
NH4+	Low Flow Pulse %	+	0.594922	0.353933	4.38261	2	0.07
Rosgen Index	Low Flow Pulse %	+	0.21699	0.0470846	0.395289	2	0.547
Conductivity	NH4+	+	0.194497	0.0378293	0.314533	2	0.59
Rosgen Index	NH4+	+	0.00280882	7.88948e-06	6.31164e-05	2	0.994
Conductivity	Precipitation	-	0.784665	0.6157	12.8171	2	0.007 *
Flashiness	Precipitation	-	0.0250124	0.000625618	0.00500808	2	0.945
Low Flow Pulse %	Precipitation	-	0.159792	0.0255335	0.20962	2	0.659
NH4	Precipitation	-	0.479969	0.23037	2.3946	2	0.16
Rosgen Index	Precipitation	+	0.0725222	0.00525947	0.0422983	2	0.842

## Sheet: S5_E_PCA
Proportion of total variation captured in principle component axes 1 or 2 of environmental predictors at 10 sites spanning a precipitation gradient along the Texas Coastal Prairie.
Principle Component	Proportion of Variance	Cumulative Proportion	Standard deviation
PC1	0.39668	0.39668	1.54275
PC2	0.2312	0.62788	1.17779
PC3	0.16815	0.79603	1.00445
PC4	0.11746	0.9135	0.839508
PC5	0.0801	0.99359	0.693242
PC6	0.00641	1	0.196064
Correlation coefficients for environmental predictors versus principal component axes 1 or 2.
R2 Channel Shape	R2 Conductivity	R2 Flashiness	R2 Low Flow Pulse %	R2 NH4+	R2 Precipitation
0.0265272	0.73551	-0.441687	0.678753	0.779369	-0.758421
-0.479503	0.50339	0.488399	-0.506033	-0.294098	-0.568119

## Sheet: S6_div_lm
Univariate regressions predicting fish species richness
community	Diversity Index	Input	Slope	df	R2	F-stat	p-value
fish	species-richness	Precipitation	0.0965659	2 8	0.764594	25.9838	0.0009328
fish	species-richness	Flashiness	-0.175485	2 8	0.000257059	0.002057	0.964937
fish	species-richness	Low Flow Pulse %	-0.114633	2 8	0.190359	1.88092	0.207461
fish	species-richness	NH4+	-18.546	2 8	0.288367	3.24176	0.109471
fish	species-richness	Conductivity	-1.40304	2 8	0.431128	6.06292	0.039178
fish	species-richness	Channel Shape	-0.130903	2 8	0.0421758	0.352264	0.569231
fish	shannon-entropy	Precipitation	0.0561773	2 8	0.576377	10.8847	0.0108719
fish	shannon-entropy	Flashiness	1.43037	2 8	0.0380411	0.316364	0.58921
fish	shannon-entropy	Low Flow Pulse %	-0.0829255	2 8	0.221887	2.28128	0.169387
fish	shannon-entropy	NH4+	-13.2213	2 8	0.326436	3.87712	0.084469
fish	shannon-entropy	Conductivity	-0.920481	2 8	0.41333	5.63628	0.0449588
fish	shannon-entropy	Channel Shape	0.112561	2 8	0.069462	0.597177	0.461876
fish	gini-simpson	Precipitation	0.0439958	2 8	0.386025	5.02985	0.0551896
fish	gini-simpson	Flashiness	2.14416	2 8	0.0933426	0.82362	0.390642
fish	gini-simpson	Low Flow Pulse %	-0.0662651	2 8	0.154715	1.46426	0.260792
fish	gini-simpson	NH4+	-11.3375	2 8	0.262112	2.84176	0.130331
fish	gini-simpson	Conductivity	-0.776123	2 8	0.320875	3.77986	0.0877771
fish	gini-simpson	Channel Shape	0.17985	2 8	0.19364	1.92113	0.20314
invertebrate	species-richness	Precipitation	-0.087732	2 8	0.0560668	0.475176	0.510111
invertebrate	species-richness	Flashiness	10.4291	2 8	0.0806596	0.701891	0.426468
invertebrate	species-richness	Low Flow Pulse %	-0.48789	2 8	0.306339	3.53302	0.0969603
invertebrate	species-richness	NH4+	-3.26185	2 8	0.000792464	0.00634474	0.938469
invertebrate	species-richness	Conductivity	-0.973631	2 8	0.0184442	0.150326	0.708336
invertebrate	species-richness	Channel Shape	-0.958574	2 8	0.200921	2.01153	0.193865
invertebrate	shannon-entropy	Precipitation	-0.0848931	2 8	0.0573885	0.487059	0.505017
invertebrate	shannon-entropy	Flashiness	8.65093	2 8	0.0606704	0.516712	0.492706
invertebrate	shannon-entropy	Low Flow Pulse %	-0.489022	2 8	0.336439	4.05616	0.0787892
invertebrate	shannon-entropy	NH4+	-2.51899	2 8	0.000516648	0.00413532	0.950304
invertebrate	shannon-entropy	Conductivity	-0.883958	2 8	0.0166197	0.135205	0.722633
invertebrate	shannon-entropy	Channel Shape	-0.899305	2 8	0.193321	1.9172	0.203557
invertebrate	gini-simpson	Precipitation	-0.0827392	2 8	0.0584815	0.496912	0.500864
invertebrate	gini-simpson	Flashiness	7.27393	2 8	0.0460157	0.385882	0.551756
invertebrate	gini-simpson	Low Flow Pulse %	-0.490221	2 8	0.362701	4.55298	0.0654079
invertebrate	gini-simpson	NH4+	-1.90732	2 8	0.000317766	0.00254293	0.961018
invertebrate	gini-simpson	Conductivity	-0.81214	2 8	0.0150501	0.122241	0.735642
invertebrate	gini-simpson	Channel Shape	-0.843453	2 8	0.182433	1.78513	0.218277

## Sheet: S7_multireg
Exhaustive multiple regression top 10 model outputs predicting Shannon diversity
Community	Intercept	Precipitation	Flashiness	Low Flow Pulse %	Conductivity	NH4+	Channel Shape	df	Log-Likelihood	AICc	Δ AICc	Weight
fish	3.8263	1.12603	NA	NA	NA	NA	NA	3	-13.31	36.62	0	0.473099
fish	3.8263	1.04097	NA	-0.532316	NA	NA	NA	4	-11.553	39.1059	2.48597	0.136499
fish	3.8263	NA	NA	NA	-0.953554	NA	NA	3	-14.9381	39.8762	3.25618	0.0928715
fish	3.8263	NA	NA	NA	NA	NA	NA	2	-17.6045	40.9234	4.30339	0.0550152
fish	3.8263	0.934602	NA	NA	NA	-0.398835	NA	4	-12.6058	41.2116	4.59163	0.0476313
fish	3.8263	NA	NA	NA	NA	-0.847415	NA	3	-15.6287	41.2574	4.63738	0.0465541
fish	3.8263	1.13398	0.317647	NA	NA	NA	NA	4	-12.7374	41.4748	4.85482	0.0417581
fish	3.8263	NA	NA	NA	-0.819745	-0.687976	NA	4	-12.7621	41.5241	4.90414	0.040741
fish	3.8263	1.10348	NA	NA	NA	NA	0.310877	4	-12.7656	41.5312	4.91122	0.0405971
fish	3.8263	0.98311	NA	NA	-0.182142	NA	NA	4	-13.2411	42.4822	5.86225	0.0252337
inverterbrate	16.7014	NA	NA	NA	NA	NA	NA	2	-33.2679	72.2502	0	0.31035
inverterbrate	16.7014	NA	NA	-4.12005	NA	NA	NA	3	-31.2173	72.4345	0.184372	0.283019
inverterbrate	16.7014	NA	NA	NA	NA	NA	-3.12312	3	-32.1938	74.3876	2.13743	0.10659
inverterbrate	16.7014	NA	NA	-6.22846	NA	3.54399	NA	4	-29.8295	75.6589	3.40874	0.0564487
inverterbrate	16.7014	NA	1.7496	NA	NA	NA	NA	3	-32.955	75.91	3.65983	0.0497887
inverterbrate	16.7014	-1.70162	NA	NA	NA	NA	NA	3	-32.9724	75.9449	3.6947	0.0489279
inverterbrate	16.7014	NA	NA	NA	-0.915718	NA	NA	3	-33.1841	76.3683	4.11812	0.0395925
inverterbrate	16.7014	NA	NA	NA	NA	-0.161453	NA	3	-33.2654	76.5307	4.28055	0.0365042
inverterbrate	16.7014	-2.42181	NA	-4.50704	NA	NA	NA	4	-30.2813	76.5627	4.31249	0.0359258
inverterbrate	16.7014	NA	NA	-3.61246	NA	NA	-2.33925	4	-30.3707	76.7415	4.4913	0.0328532

## Sheet: S8_F_RDA_vectors
Hellinger-transformed rish RDA vector summary statistics
Environmental Vector	axis1	axis2	R2	p-value
NH4+	0.935682	-0.352845	0.313213	0.042
Precipitation	-0.982774	0.184812	0.291954	0.051
Low Flow Pulse %	0.797608	-0.603176	0.299928	0.062
Conductivity	0.97197	-0.235104	0.163473	0.168
Channel Shape	0.693055	0.720885	0.0319194	0.502
Flashiness	-0.947534	-0.319654	0.000692409	0.914
Species Vector	axis1	axis2	R2	p-value
C.lutrensis	-0.40415	-0.525725	0.857481	0.004
L.macrochirus	-0.279569	0.206929	0.605345	0.009
P.latipinna	0.592063	-0.220203	0.838267	0.01
L.megalotis	-0.414253	0.195282	0.461977	0.02
G.affinis	0.312164	0.241821	0.396283	0.036
L.cyanellus	-0.0483147	0.215827	0.0905415	0.252
A.melas	-0.0279356	-0.0477629	0.0775685	0.39
T.maculatus	-0.0161286	-0.0275759	0.0775685	0.39
F.notatus	-0.0702436	0.0896413	0.0479923	0.396
L.humilis	-0.00568477	0.0399989	0.0241146	0.531
L.marginatus	-0.00803947	0.0565669	0.0241146	0.531
P.vigilax	-0.0192126	-0.100317	0.0275735	0.546
L.gulosus	-0.0543356	0.00943615	0.00932926	0.678
C.venusta	-0.0360969	0.0156418	0.0072668	0.797
L.auritis	-0.0915887	0.00447737	0.00820152	0.813
A.rostrata	-0.0700522	0.0408787	0.00693541	0.819
H.cyanoguttatus	-0.0574572	-0.00621458	0.00624437	0.823
E.gracile	-0.0238826	0.0479044	0.00622658	0.898

## Sheet: S9_i_RDA_vectors
Environmental Vector	axis1	axis2	R2	p-value
Conductivity	0.866914	-0.498457	0.791619	0.002
Precipitation	-0.838841	0.544377	0.44041	0.016
NH4+	0.274742	-0.961518	0.0335157	0.482
Low Flow Pulse %	0.338597	-0.940932	0.0279251	0.521
Channel Shape	0.592091	0.805871	0.0176641	0.589
Flashiness	-0.832324	0.554289	0.015631	0.63
Species Vector	axis1	axis2	R2	p-value
CHEUMATOPSYCHE	-0.228748	-0.0572998	0.71776	0.004
MELANOIDES	0.261182	-0.106539	0.517368	0.013
HYALELLA	-0.156489	0.0855353	0.557253	0.014
BIOMPHALARIA	0.20632	0.0368815	0.700886	0.016
FOSSARIA	0.177034	-0.0504146	0.418298	0.043
FALLCEON	-0.127941	0.119455	0.322154	0.044
PLAUDITUS	-0.0791833	0.114708	0.302728	0.05
CAENIS	-0.0268716	0.183826	0.31539	0.053
HYDRAENA	0.0440838	0.107803	0.239032	0.057
AMNICOLA	0.0716719	-0.169346	0.265423	0.07
PALAEMONETES	-0.131276	0.0509544	0.257356	0.083
PELTODYTES	0.063518	0.163604	0.269181	0.085
AMPHIAGRION	0.0383521	0.119067	0.18651	0.123
PHYSA	0.0669871	0.11238	0.190494	0.129
BRECHMORHOGA	-0.0300431	-0.0880393	0.176292	0.153
ERPETOGOMPHUS	-0.0424874	-0.124506	0.176292	0.153
GAMMARUS	-0.0300431	-0.0880393	0.176292	0.153
RHAGOVELIA	-0.0424874	-0.124506	0.176292	0.153
CENTROPTILUM	0.0579214	0.0806093	0.222135	0.174
ERYTHEMIS	0.0579214	0.0806093	0.222135	0.174
HYDROBIUS	0.0579214	0.0806093	0.222135	0.174
MESOVELIA	0.0579214	0.0806093	0.222135	0.174
RANATRA	0.0579214	0.0806093	0.222135	0.174
VALVATA	0.0579214	0.0806093	0.222135	0.174
STENELMIS	-0.120422	-0.130935	0.15092	0.182
BRACHYCERUS	-0.0665197	0.0763661	0.115147	0.271
BITHYNIA	0.0984995	0.0966356	0.0865661	0.279
CAMPELOMA	0.108226	-0.0970802	0.125605	0.285
ALISOTRICHIA	-0.0470304	0.0562923	0.059403	0.318
BAETODES	-0.0470304	0.0562923	0.059403	0.318
PHYSELLA	-0.074628	0.0306551	0.0719874	0.328
DUBIRAPHIA	-0.039768	-0.10769	0.075512	0.337
AMELETUS	-0.0804408	0.0347702	0.0530916	0.372
CERCOBRACHYS	-0.0804408	0.0347702	0.0530916	0.372
CORBICULA	-0.151423	0.0292459	0.0602146	0.395
CAECIDOTEA	-0.0229146	-0.0757909	0.0540984	0.396
HEBRUS	-0.0162031	-0.0535922	0.0540984	0.396
LEPTONEMA	-0.0162031	-0.0535922	0.0540984	0.396
NEONEURA	-0.0162031	-0.0535922	0.0540984	0.396
ORCONECTES	-0.0162031	-0.0535922	0.0540984	0.396
SIPHLONURUS	-0.0162031	-0.0535922	0.0540984	0.396
LEPTOHYPHES	-0.0321529	0.0584154	0.0445791	0.409
BELOSTOMA	-0.0469503	0.0379088	0.0416575	0.472
PSEUDOSUCCINEA	0.0869777	-0.000639408	0.0217024	0.586
CAMELOBAETIDIUS	-0.0195728	-0.0487156	0.0216134	0.605
HELICINA	-0.0138401	-0.0344471	0.0216134	0.605
HYDROPSYCHE	-0.0138401	-0.0344471	0.0216134	0.605
ISONYCHIIDAE	-0.0195728	-0.0487156	0.0216134	0.605
LIPOGOMPHUS	-0.0138401	-0.0344471	0.0216134	0.605
MACRELMIS	-0.0138401	-0.0344471	0.0216134	0.605
PHILOPOTAMIDAE	-0.0195728	-0.0487156	0.0216134	0.605
RHEUMATOBATES	-0.0138401	-0.0344471	0.0216134	0.605
CYPHON	-0.0259279	-0.0732432	0.0182651	0.626
PISIDIUM	-0.0401723	-0.0533525	0.0215628	0.69
STACTOBIELLA	-0.0401723	-0.0533525	0.0215628	0.69
FERRISSIA	0.00040432	-0.0543379	0.00741098	0.726
HELISOMA	-0.0597417	-0.0148951	0.006133	0.747
LIMNOPORUS	-0.0239675	0.0471004	0.0126096	0.811
METRICHIA	-0.0138376	0.0271934	0.0126096	0.811
MICROVELIA	-0.0138376	0.0271934	0.0126096	0.811
PSEUDOCLOEON	-0.0138376	0.0271934	0.0126096	0.811
STROBILOPS	-0.0138376	0.0271934	0.0126096	0.811
BAETIS	-0.0334104	-0.0215221	0.00500014	0.816
TREPOBATES	0.00906568	0.0317705	0.00403971	0.852
NEOPLEA	-0.0276777	-0.00725368	0.00379878	0.86
LEPTOCERIDAE	0.0209233	-0.0581722	0.0024469	0.882
CALOPTERYX	0.028635	-0.00668683	0.00169972	0.894
CHROMAGRION	0.028635	-0.00668683	0.00169972	0.894
GYRETES	0.028635	-0.00668683	0.00169972	0.894
HETERELMIS	0.028635	-0.00668683	0.00169972	0.894
LIMNOCORIS	0.028635	-0.00668683	0.00169972	0.894
LINISA	0.028635	-0.00668683	0.00169972	0.894
PELOCORIS	0.028635	-0.00668683	0.00169972	0.894
PROCLOEON	0.028635	-0.00668683	0.00169972	0.894
SCIRTES	0.028635	-0.00668683	0.00169972	0.894
ARGIA	0.0302315	-0.0233905	0.000394451	0.91
AMETROPUS	-5.11063e-17	-1.97799e-17	0	1
ANCYRONYX	0.0142444	-0.0198908	0.000491801	1
BEROSUS	0	0	0	1
CLOEON	0	0	0	1
ELODES	-0.0143906	-0.0132039	0.000918366	1
FARRODES	0.000957343	-0.0139405	8.83253e-06	1
GLAENOCORISA	0	0	0	1
GYRAULUS	0	0	0	1
HETAERINA	0	0	0	1
MACRONYCHUS	-0.0143906	-0.0132039	0.000918366	1
MENETUS	0	0	0	1
MORPHOCORIXA	0	0	0	1
NEOELMIS	0	0	0	1
PLANORBULA	0	0	0	1
POTAMYIA	0	0	0	1
SMICRIDEA	0	0	0	1
SPHAERIDIINAE	0	0	0	1
STENONEMA	-0.0203515	-0.0186732	0.000918366	1
SYNAPTONECTA	0	0	0	1

## Sheet: S10_Env_all
Site Name	STAID	conductivity	DO	turbidity	Temperature water	pH	bank height	Channel Shape	canopy	d50	NH4+	PO4-	NO3-	flash index	HFPP	LFPP	Av.Flow	Precipitaiton (cm/yr)	Mean Air Temperature (°C)	Minimum Air Temperature (°C)	Maximum Air Temperature (°C)	Elevation (m)	Average Basin Slope (%)	Human Development (%)	Planted Cropland (%)	Average Clay Content (%)	Average Silt Content (%)	Average Sand Content (%)
San Fernando	8211900	979	5.82865	67.1725	23.275	6.4275	0.59125	15.7619	89.8649	2	0.2975	4.275	1.8	0.906775	0.173333	20.3057	13.8337	67.75	21.87	15.29	28.58	50	1.2	4.74	28.01	25.31	30.57	44.12
Tranquitas	8212300	8923	9.97138	66.1317	22.525	7.9875	0.75	17.9881	68.7688	2	0.1525	0.125	0.07	0.780885	0.312763	24.0603	1.76302	67.75	21.87	15.29	28.58	50	1.2	4.74	28.01	25.31	30.57	44.12
Medio	8189300	852.25	4.2055	68.798	19.025	6.895	0.69125	18.4051	14.4144	2	0.1125	0.405	0.0075	0.993328	0.429579	0	3.11866	79.13	21.25	14.9	27.74	58	1.7	5.24	40.31	28.39	29.89	41.72
Aransas	8189700	929.5	7.64864	66.3508	19.05	7.0775	0.54	11.7806	58.5586	32	0.105	4.1275	0.6375	1.05309	0.112031	7.6636	35.0384	80.77	21.17	15.48	27.86	24	0.9	8.28	52.39	30.38	30.11	39.51
Mission	8189500	1291	5.27661	68.6133	23.6	7.215	0.46	14.7009	68.4685	2	0.17	0.315	0.04	0.580292	0.207695	3.35684	115.13	85.36	21.31	15.33	27.78	6	0.9	3.72	35.06	29.49	30.4	40.11
Perdido	8177300	736.75	7.20349	66.1985	18.875	7.1825	0.2875	15.1517	0.900901	2	0.075	0.2975	0.0225	1.33879	0.286174	0	5.41282	92.37	21.3	15.09	27.67	45	1.1	2.45	27.41	30.25	28.96	40.79
Garcitas	8164600	517.75	5.5866	66.9087	22.575	7.135	0.33875	18.1607	73.6486	2	0.0975	0.4075	0.0475	0.805783	0.284598	4.86667	43.9845	102.41	21.01	15.21	27.1	13	0.3	4.28	50.34	27.16	32.52	40.32
Placedo	8164800	1135.5	8.59617	70.6598	24.625	7.3125	0.4375	13.3796	29.2793	25	0.0875	0.2975	0.44	0.921217	0.255632	5.48199	44.7174	104.65	21.13	15.58	27.04	8	0	11.81	78.16	42.94	34.05	23.01
Big Creek	8115000	219.25	7.88137	99.0837	15.875	6.9625	0.36125	23.1499	0	2	0.1175	1.6675	2.9	0.960737	0.240215	15.6309	43.5375	120.31	20.36	14.63	26.42	24	0	10.88	77.35	42.47	37.91	19.61
Bear Branch	8068390	227.125	8.17251	67.4553	17	6.7625	0.893125	12.0107	44.1441	2	0.1325	0.1675	0.02	0.776944	0.249808	13.1456	25.875	124.19	19.75	13.94	26.02	41	0.4	76.71	0.82	22.8	25.32	51.88

[truncated: 1 more sheets: S11_Var_desc]
