# Supplementary material for: Effects of a natural precipitation gradient on fish and macroinvertebrate assemblages in coastal streams
Source: PeerJ. 2021 Oct 1;9:e12137. doi: 10.7717/peerj.12137 (PMC8489409; doi:10.7717/peerj.12137)
Supplement: Supplemental Information 8 [file peerj-09-12137-s008.csv]

Site.Name	STAID	AP	RH	Bas.dev	Bas.forest	Bas.plant	Soil.Perm	Soil.Org	Rip.forest	log.cond	DO	turbidity	Twater	pH	bank.height	Rosgen.Index	canopy	d50	NH4.	PO4.	log.no3	flash.index	HFPP	LFPP	Av.Flow	DRAIN_SQKM
Bear Branch	8068390	124.19	71.4	76.71	9.98	0.82	3.75	0.48	14.33	5.425500527	8.173	67.455	17	6.763	0.893	12.011	44.144	2	0.133	0.168	-3.912023005	0.777	0.25	13.146	25.875	40.2
Big Creek	8115000	120.31	71.6	10.88	2.57	77.35	0.65	2.55	9.06	5.390212631	7.881	99.084	15.875	6.963	0.361	23.15	0	2	0.118	1.668	1.064710737	0.961	0.24	15.631	43.538	116.7
Garcitas	8164600	102.41	74.2	4.28	17.53	50.34	1.75	0.75	19.86	6.2494925	5.587	66.909	22.575	7.135	0.339	18.161	73.649	2	0.098	0.408	-3.036554268	0.806	0.285	4.867	43.985	253.9
Placedo	8164800	104.65	75	11.81	2.57	78.16	0.5	0.9	5.28	7.034828362	8.596	70.66	24.625	7.313	0.438	13.38	29.279	25	0.088	0.298	-0.820980552	0.921	0.256	5.482	44.717	172.2
Perdido	8177300	92.37	72.1	2.45	34.85	27.41	1.17	0.94	32.9	6.602248622	7.203	66.199	18.875	7.183	0.288	15.152	0.901	2	0.075	0.298	-3.772261063	1.339	0.286	0	5.413	72.2
Medio	8189300	79.13	72	5.24	1.44	40.31	1.16	0.95	2.27	6.747879911	4.206	68.798	19.025	6.895	0.691	18.405	14.414	2	0.113	0.405	-4.828313737	0.993	0.43	0	3.119	527.3
Mission	8189500	85.36	73.4	3.72	8.43	35.06	1.1	0.82	11.05	7.163172391	5.277	68.613	23.6	7.215	0.46	14.701	68.468	2	0.17	0.315	-3.218875825	0.58	0.208	3.357	115.13	1808.3
Aransas	8189700	80.77	74.1	8.28	3.58	52.39	0.96	0.8	7.41	6.834646807	7.649	66.351	19.05	7.078	0.54	11.781	58.559	32	0.105	4.128	-0.449416996	1.053	0.112	7.664	35.038	631.3
San Fernando	8211900	67.75	69.6	4.74	1.48	28.01	1.36	0.91	3.92	6.886531643	5.829	67.172	23.275	6.428	0.591	15.762	89.865	2	0.298	4.275	0.587786665	0.907	0.173	20.306	13.834	1303.7
Tranquitas	8212300	67.75	69.6	4.74	1.48	28.01	1.36	0.91	3.92	9.096387492	9.971	66.132	22.525	7.988	0.75	17.988	68.769	2	0.153	0.125	-2.659260037	0.781	0.313	24.06	1.763	125.6
