# Supplementary material for: Effects of a natural precipitation gradient on fish and macroinvertebrate assemblages in coastal streams
Source: PeerJ journal article supplement (doi:10.7717/peerj.12137), 2021-10-01

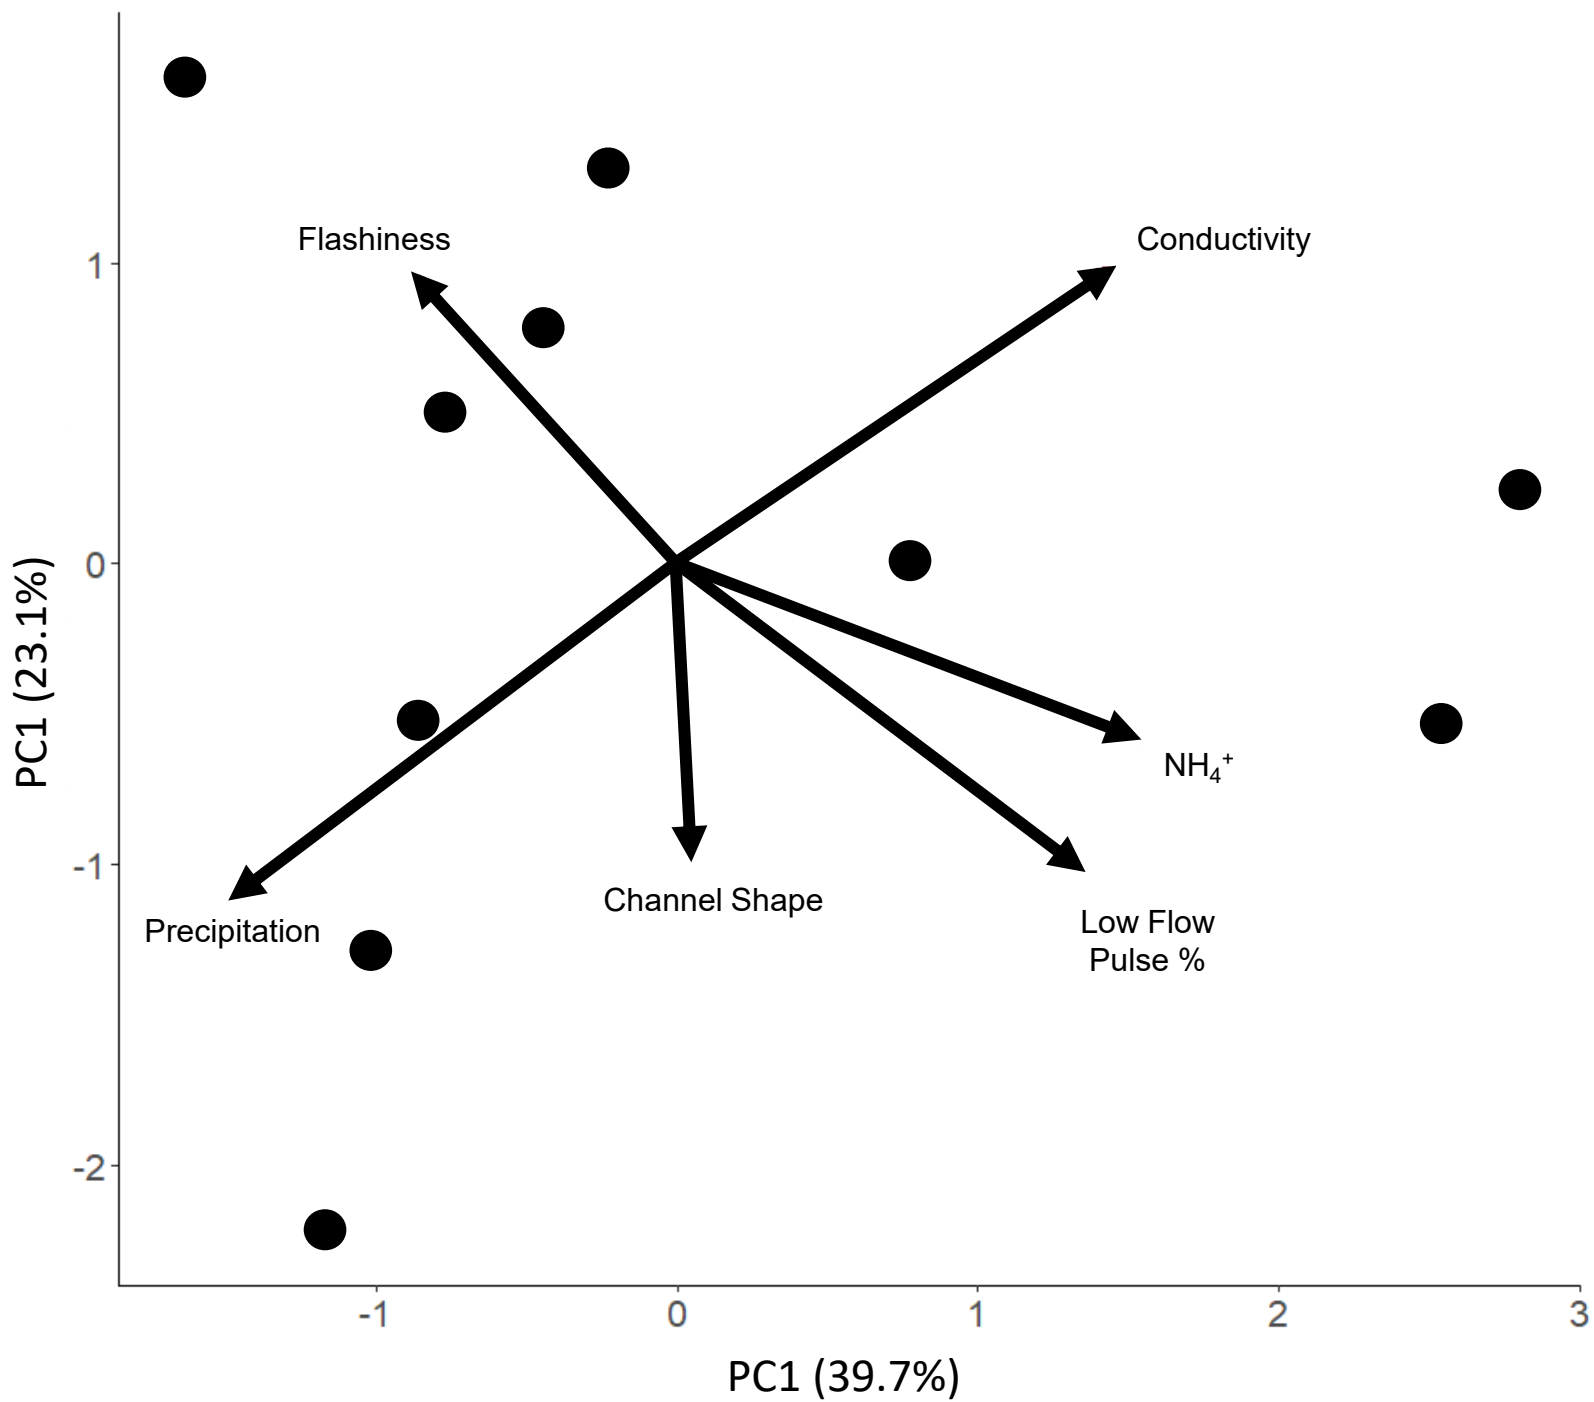

Supplement: Supplemental_Figure_PCA.pdf [file Supplemental_Figure_PCA.pdf]
